# Supplementary material
Source: ML conference proceedings conference paper supplement (https://openaccess.thecvf.com/content/CVPR_2019/html/Wen_Single_Image_Reflection_CVPR_2019_paper.html)
Supplement: Supplementary file 1 [file Wen_Single_Image_Reflection_CVPR_2019_supplemental.pdf]

# Single Image Reflection Removal Beyond Linearity

## *Supplementary Materials*

Qiang Wen<sup>1</sup>, Yinjie Tan<sup>1</sup>, Jing Qin<sup>2</sup>, Wenxi Liu<sup>3</sup>, Guoqiang Han<sup>1</sup>, Shengfeng He<sup>1\*</sup>

<sup>1</sup> School of Computer Science and Engineering, South China University of Technology

<sup>2</sup> Department of Nursing, Hong Kong Polytechnic University

<sup>3</sup> College of Mathematics and Computer Science, Fuzhou University

### 1. More Qualitative Results

#### References

- [1] Qingnan Fan, Jiaolong Yang, Gang Hua, Baoquan Chen, and David P Wipf. A generic deep architecture for single image reflection removal and image smoothing. In *ICCV*, pages 3258–3267, 2017. [2](#), [3](#), [4](#), [5](#), [6](#), [7](#)
- [2] Renjie Wan, Boxin Shi, Ling-Yu Duan, Ah-Hwee Tan, and Alex C Kot. Benchmarking single-image reflection removal algorithms. In *ICCV*, 2017. [2](#)
- [3] Jie Yang, Dong Gong, Lingqiao Liu, and Qinfeng Shi. Seeing deeply and bidirectionally: A deep learning approach for single image reflection removal. In *ECCV*, pages 654–669, 2018. [2](#), [3](#), [4](#), [5](#), [6](#), [7](#)
- [4] Xuaner Zhang, Ren Ng, and Qifeng Chen. Single image reflection separation with perceptual losses. *CVPR*, 2018. [2](#), [3](#), [4](#), [5](#), [6](#), [7](#)

---

\*Corresponding author (hesfe@scut.edu.cn).

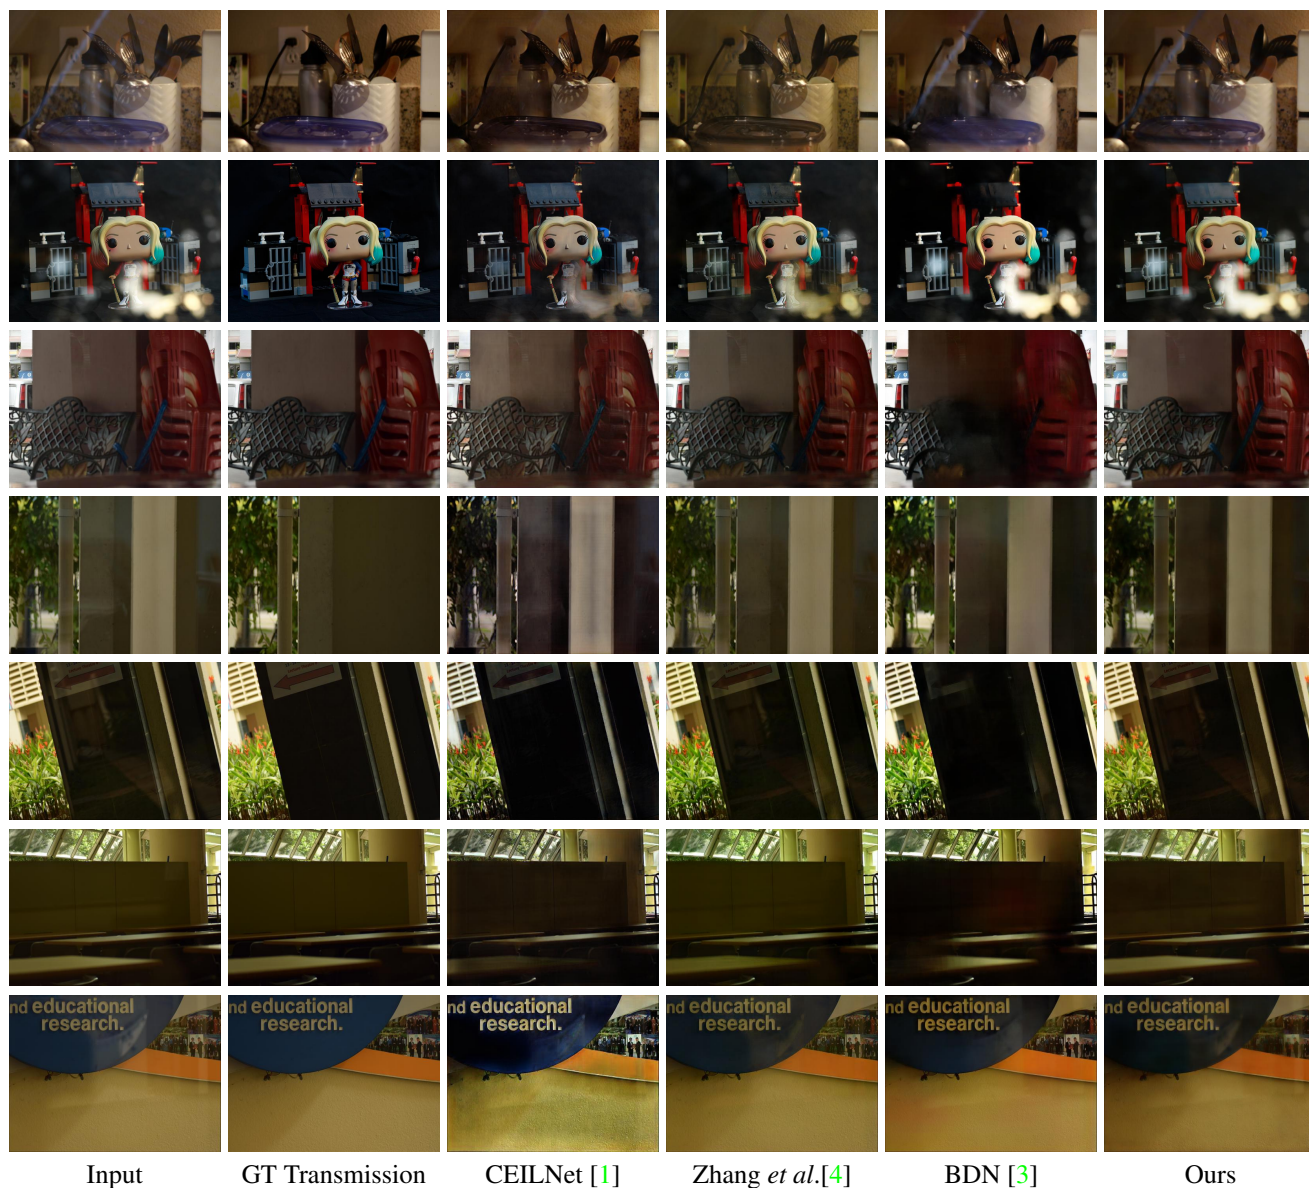

Figure 1. More results of Zhang *et al.*[4] and  $SIR^2$  [2]



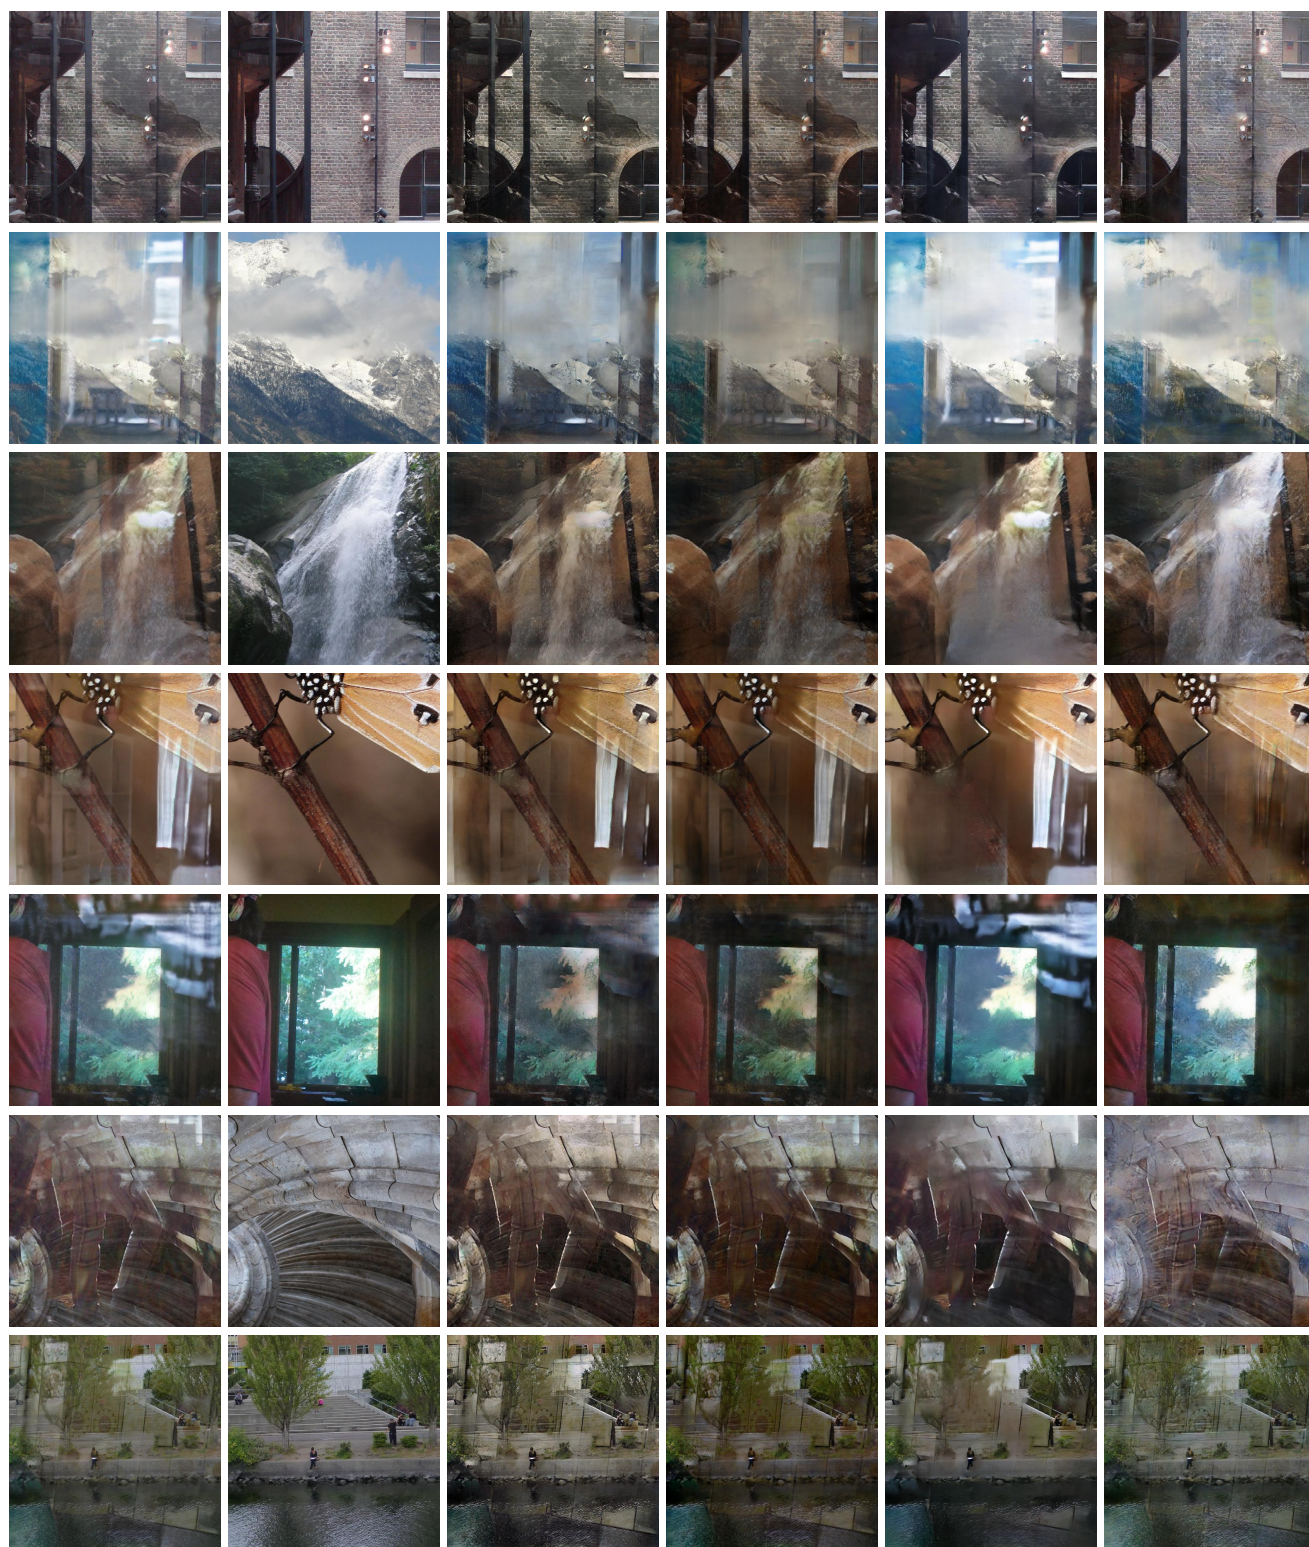

Input

GT Transmission

CEILNet[1]

Zhang *et al.*[4]

BDN [3]

Ours

Figure 2. More results of Syn. Focused



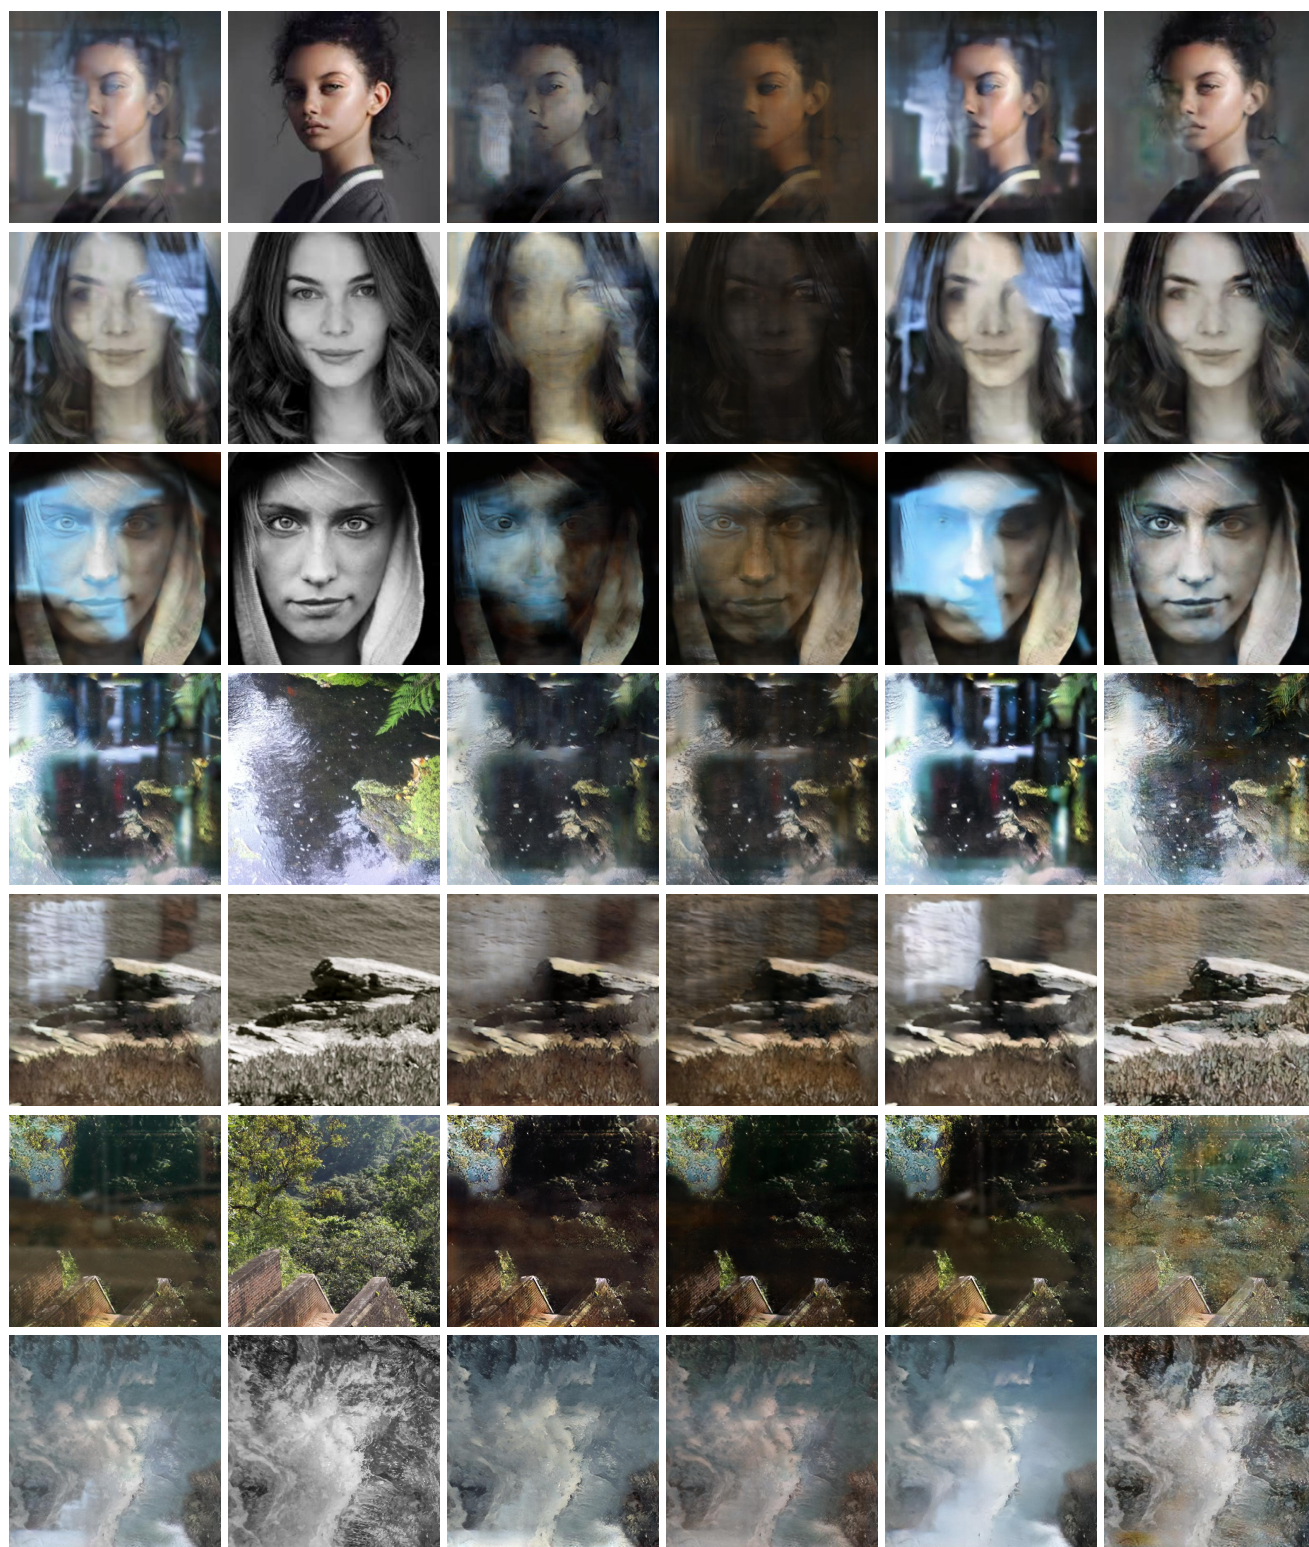

Input

GT Transmission

CEILNet[1]

Zhang *et al.*[4]

BDN [3]

Ours

Figure 3. More results of Syn. Defocused



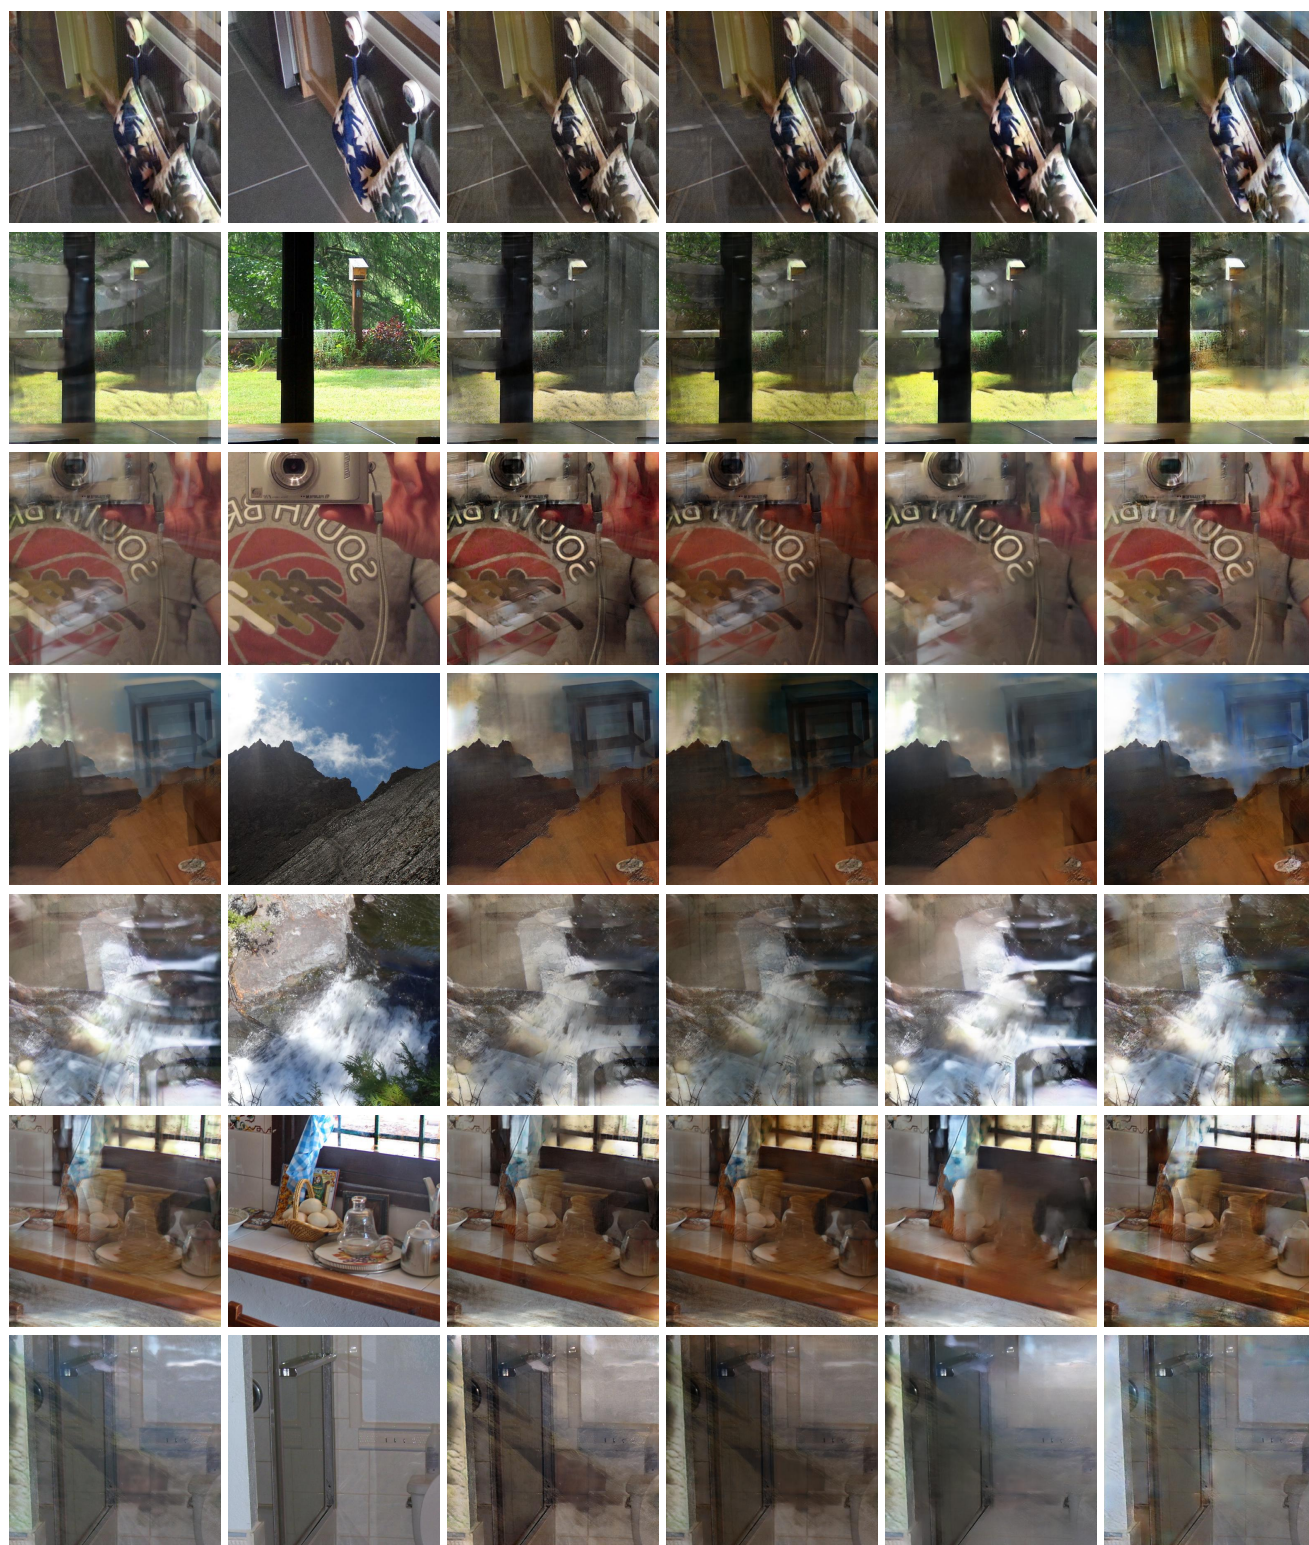

Input

GT Transmission

CEILNet[1]

Zhang *et al.*[4]

BDN [3]

Ours

Figure 4. More results of Syn. Ghosting



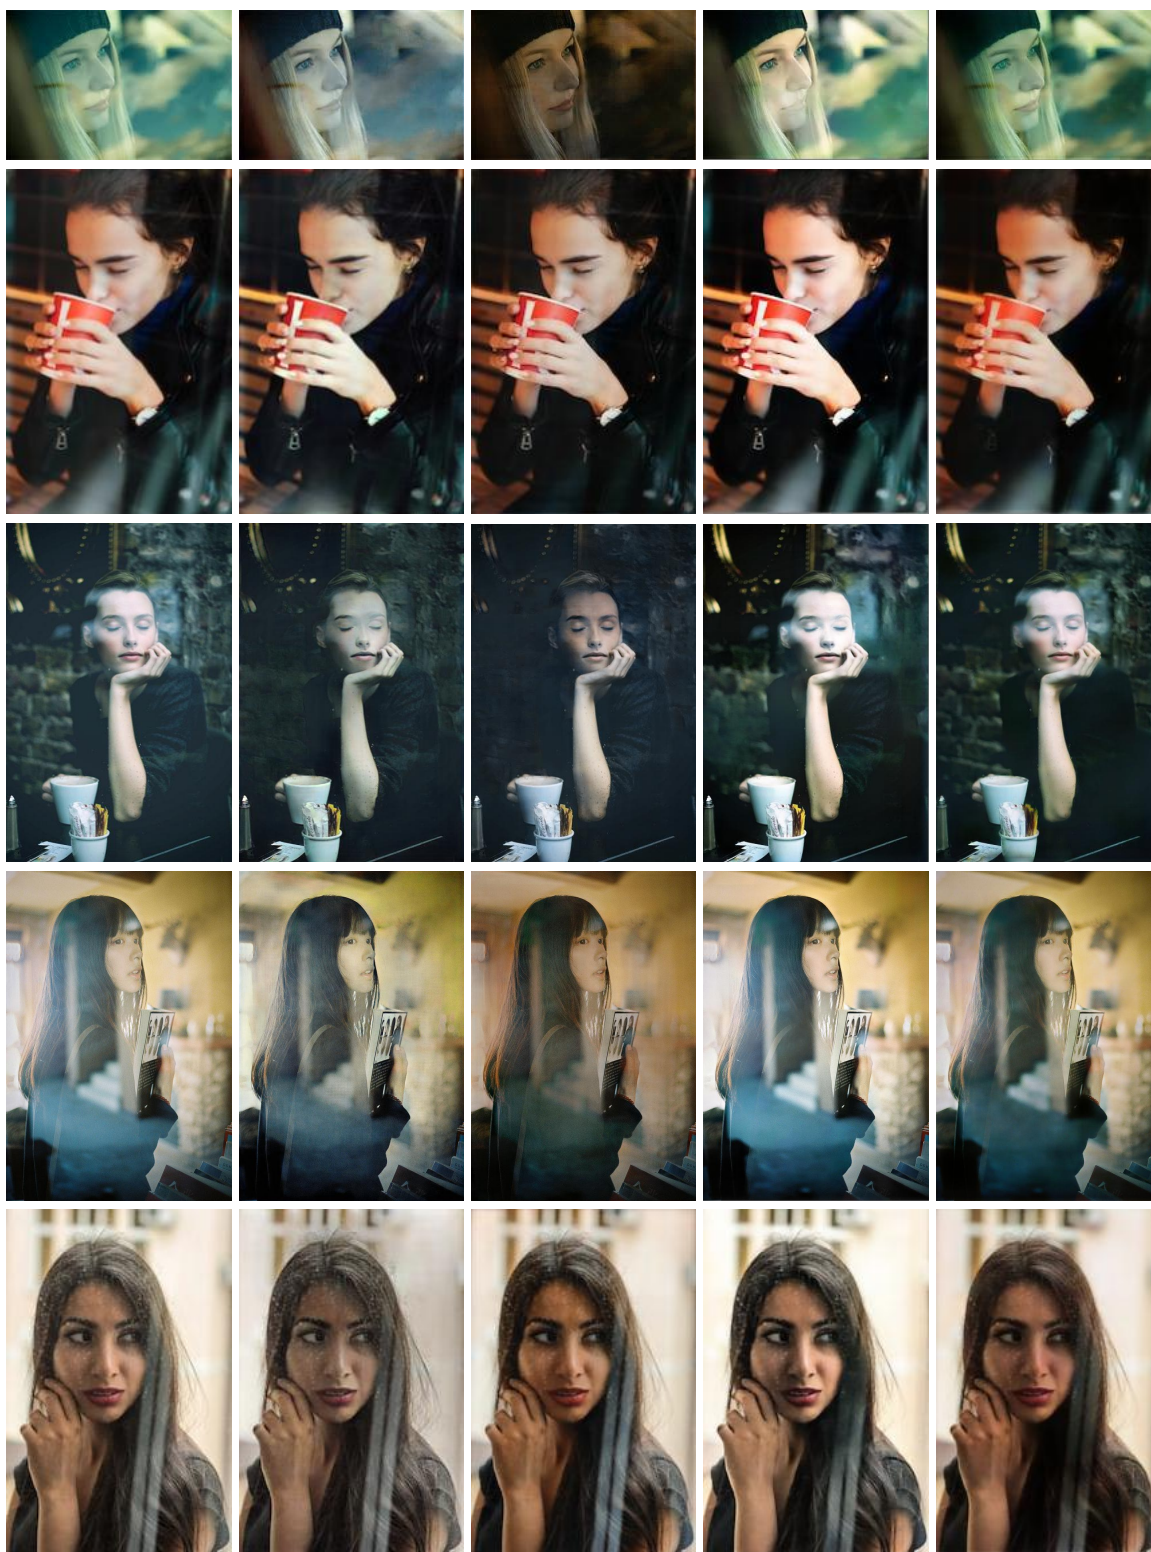

Input

CEILNet[1]

Zhang *et al.*[4]

BDN [3]

Ours

Figure 5. More results of real-world reflection images (1)



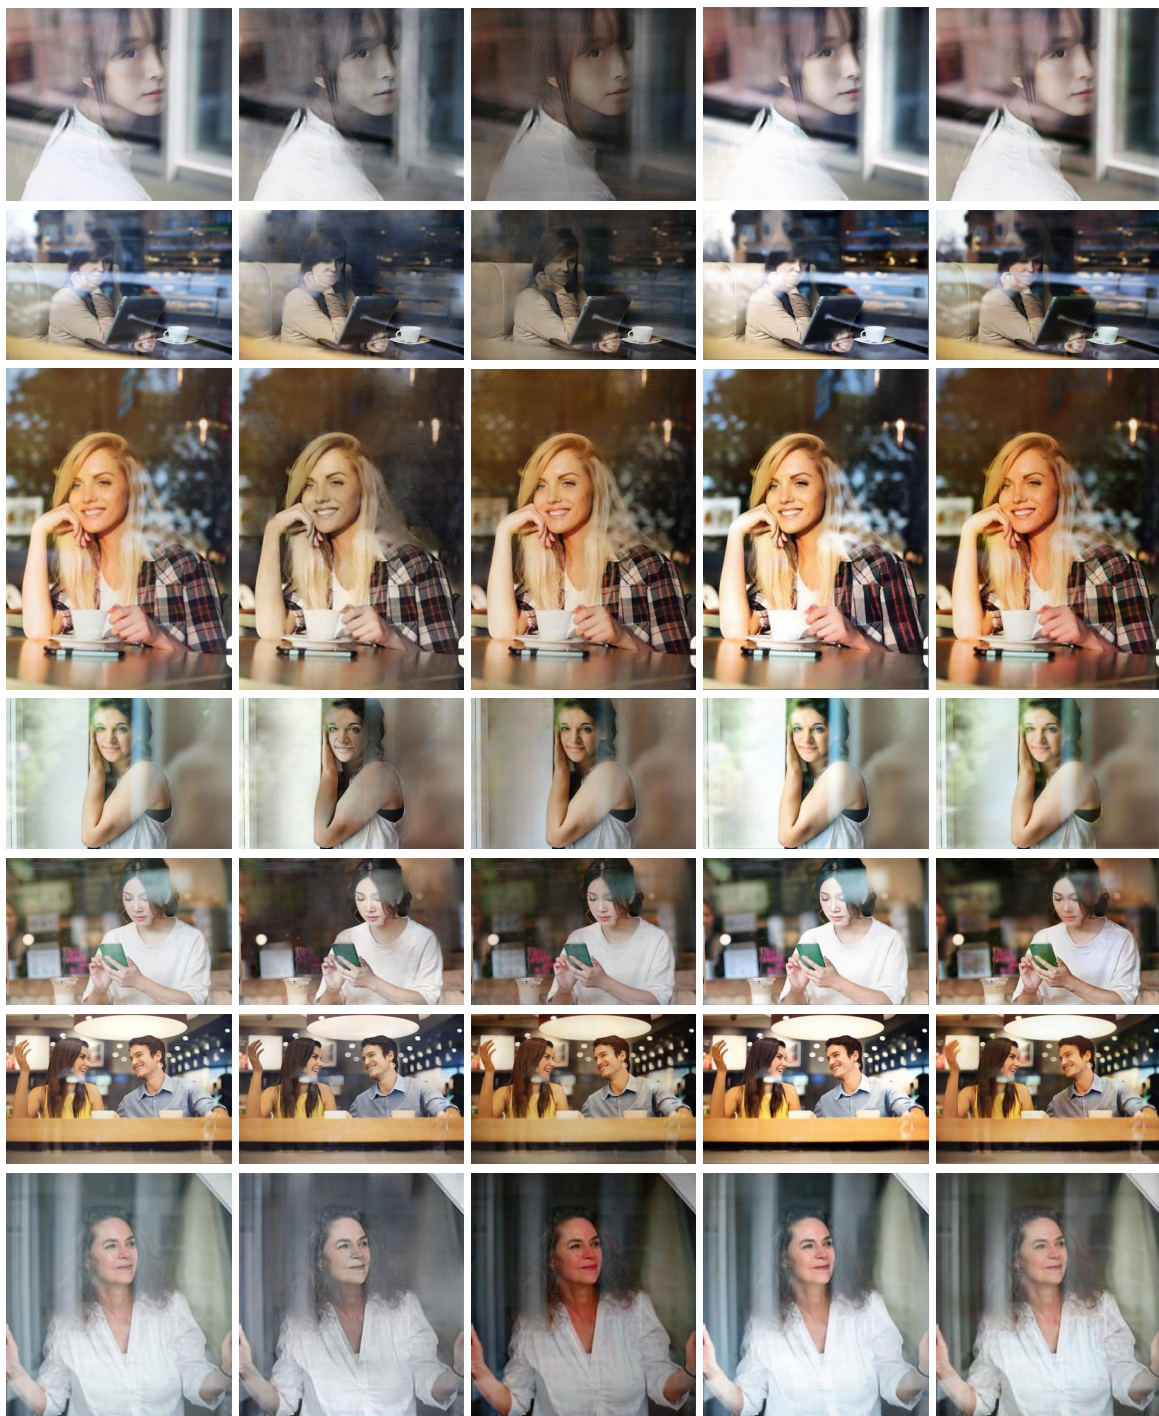

Input

CEILNet[1]

Zhang et al.[4]

BDN [3]

Ours

Figure 6. More results of real-world reflection images (2)
